# Supplementary material
Source: Springer Nature journal article supplement (https://www.springermedizin.de/resource/supplementary/13045_2014_383_MOESM3_ESM.pdf/9661268)

● Vehicle (n=18)    ▲ rHuIL-12 100 ng/Kg (n=18)    ● rHuIL-12 500 ng/Kg (n=18)

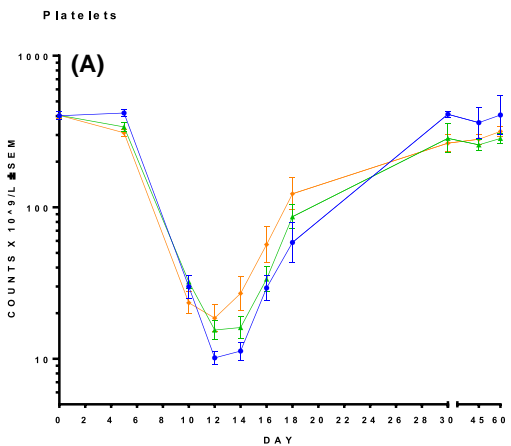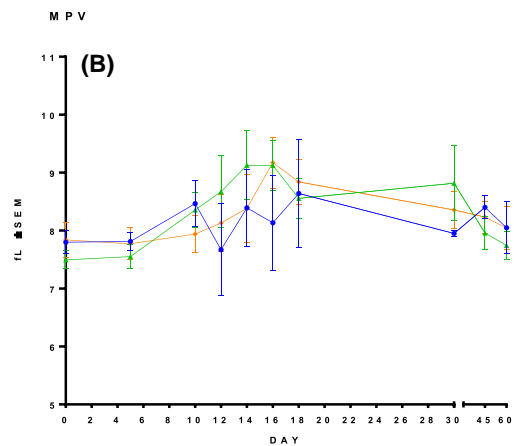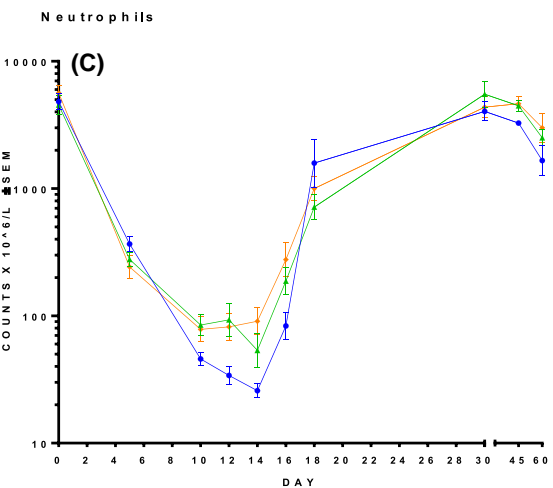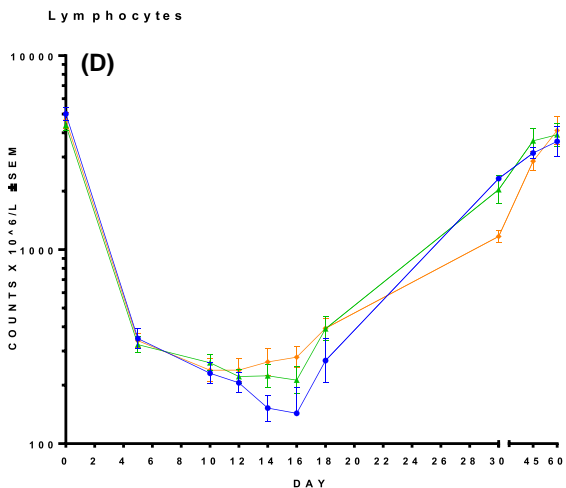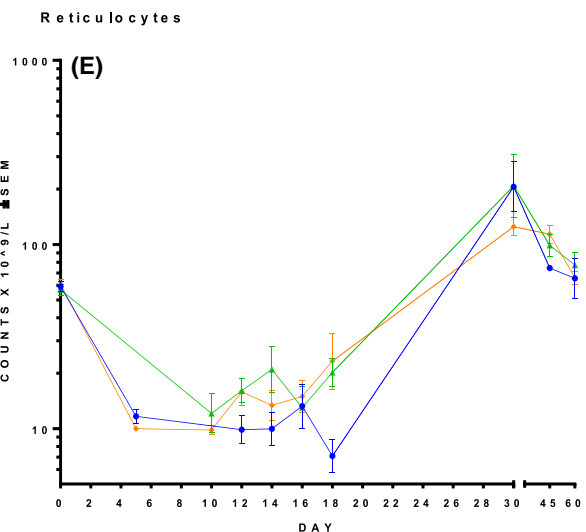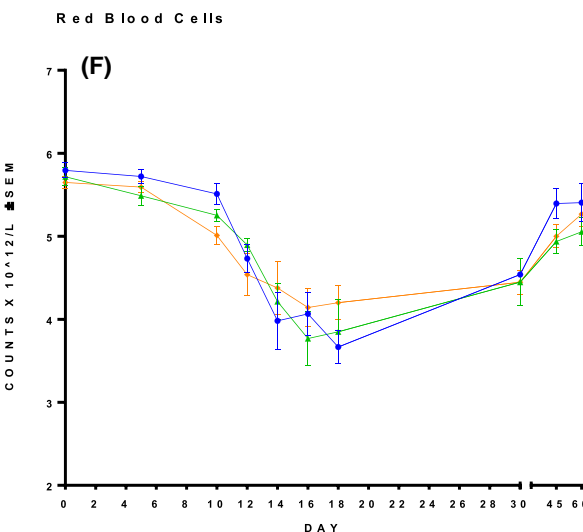

Supplement: MOESM3 [file 9661268]
